# Supplementary material for: Xanthine dehydrogenase as a prognostic biomarker related to tumor immunology in hepatocellular carcinoma
Source: Springer Nature journal article supplement (doi:10.1186/s12935-021-02173-7), 2021-09-08
Supplement: MOESM1 [file 12935_2021_2173_MOESM1_ESM-1.pdf]

# Supplementary Figure 1

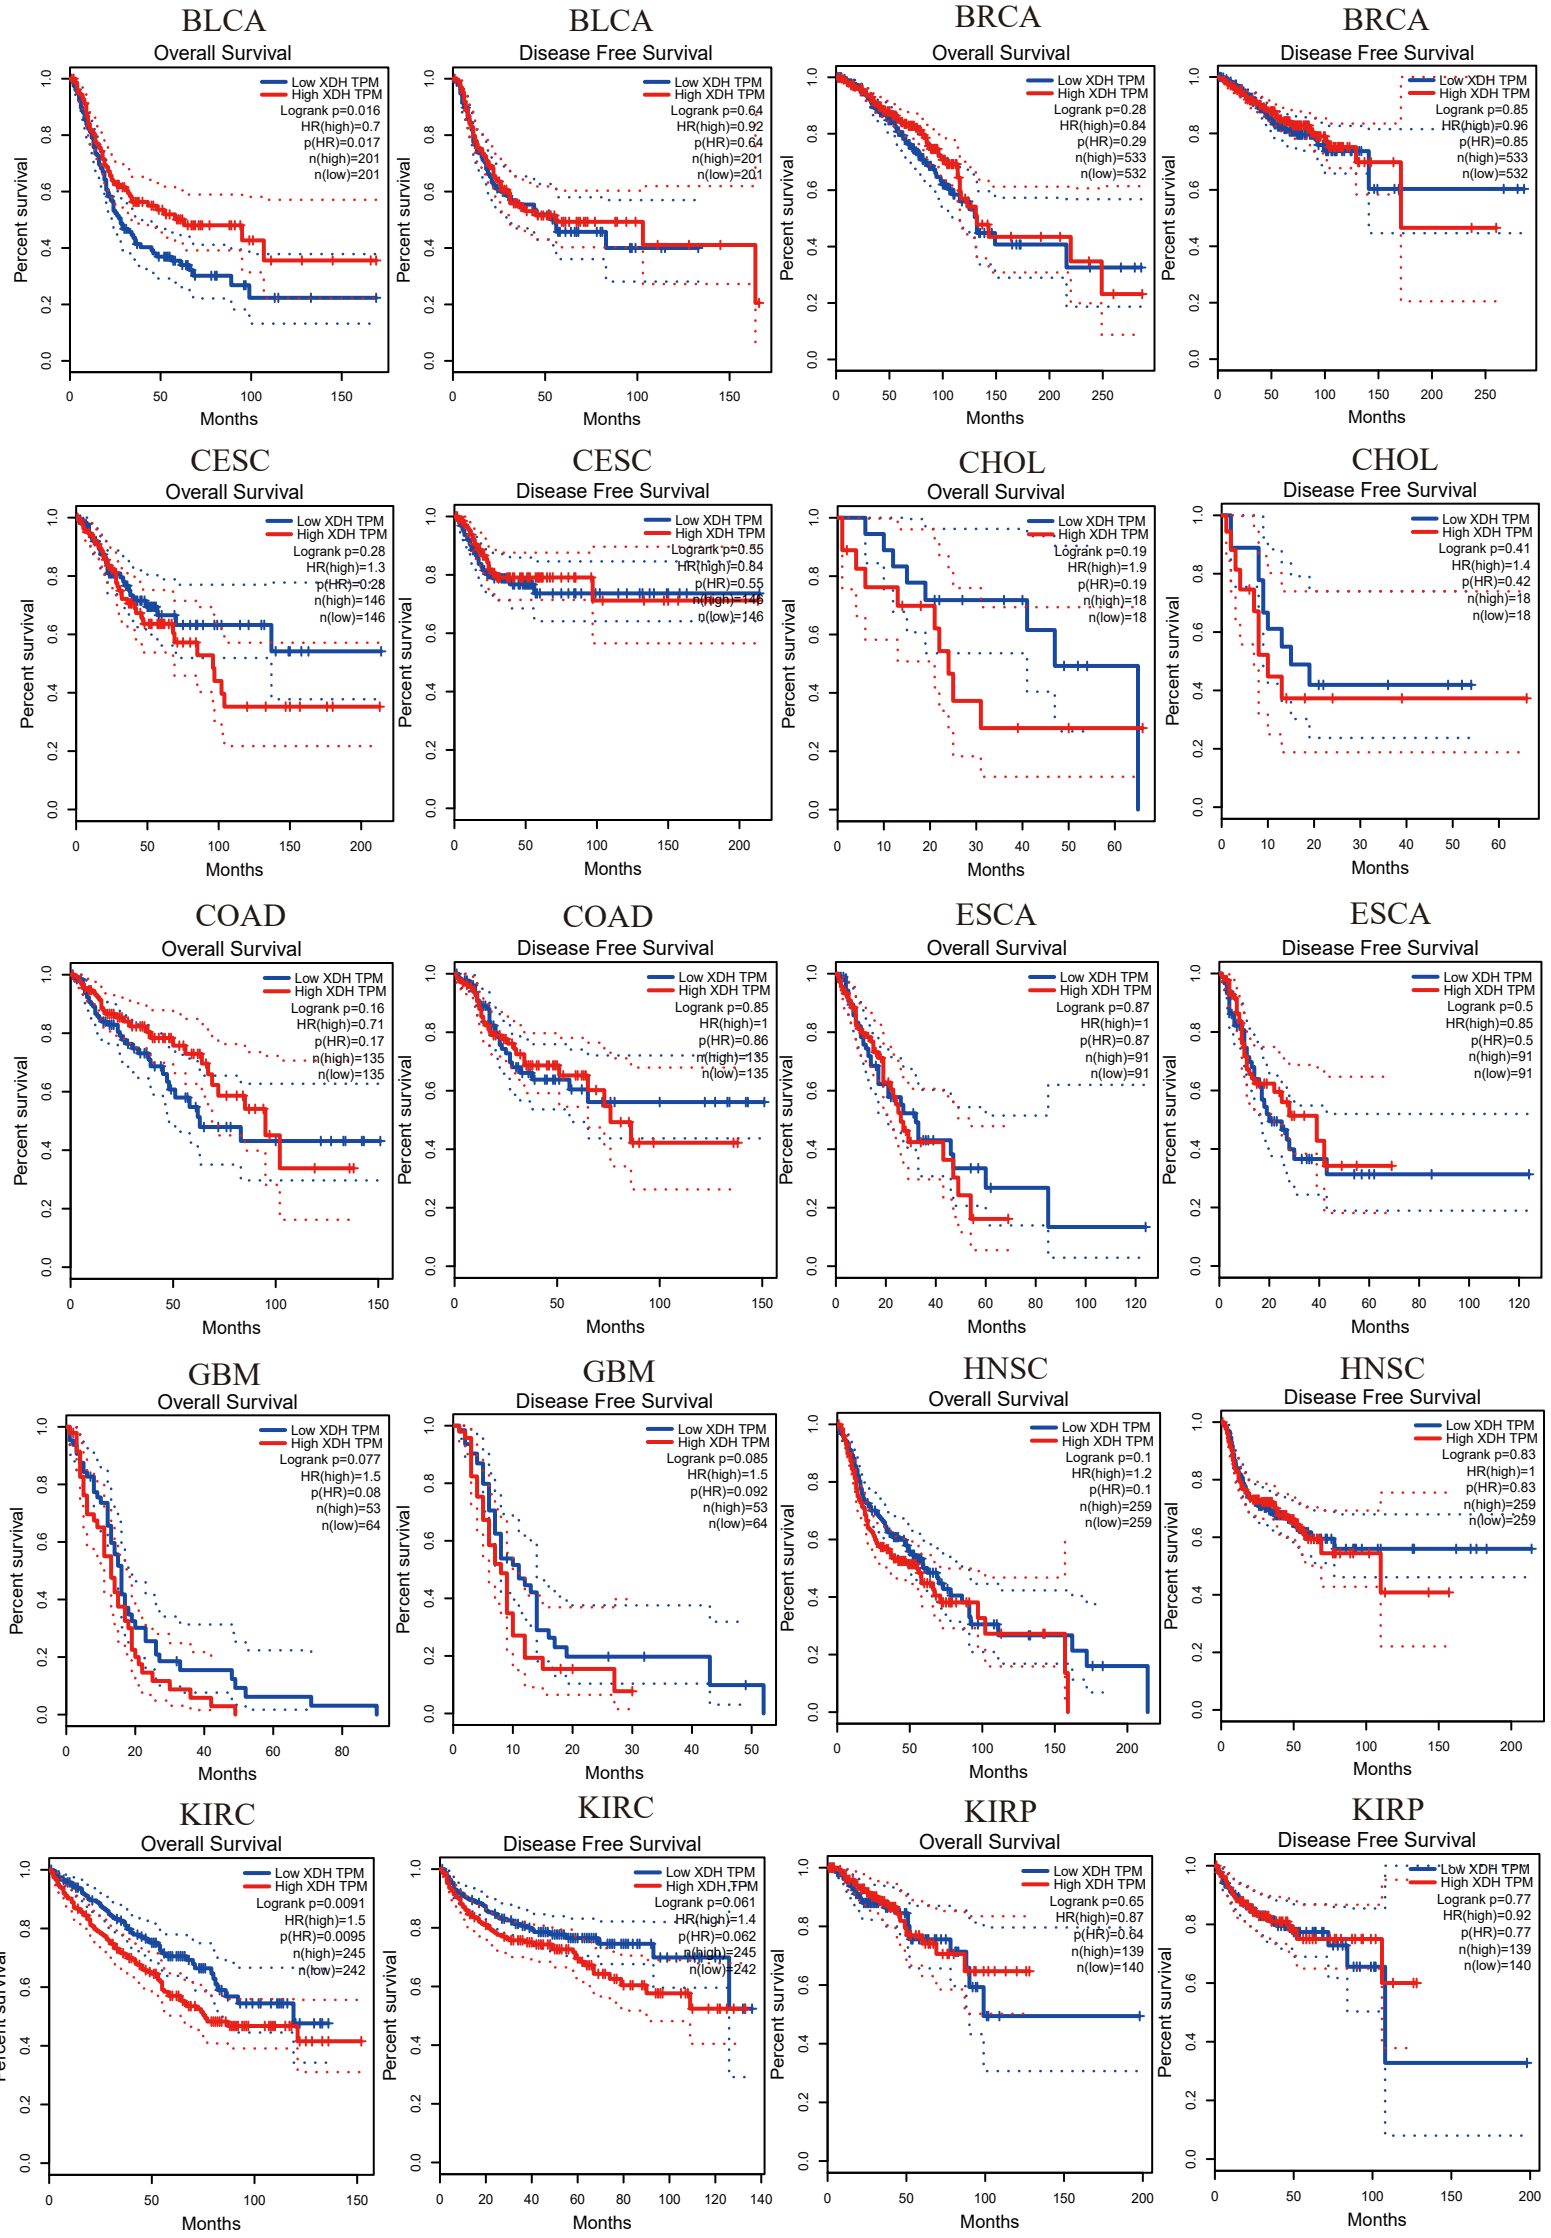

# LIHC

## Overall Survival

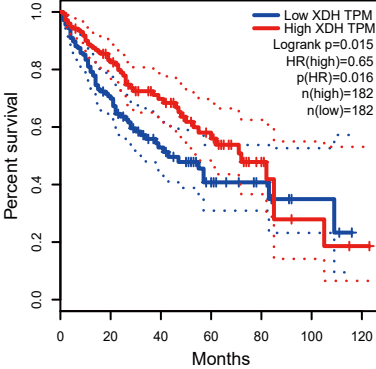

# LIHC

## Disease Free Survival

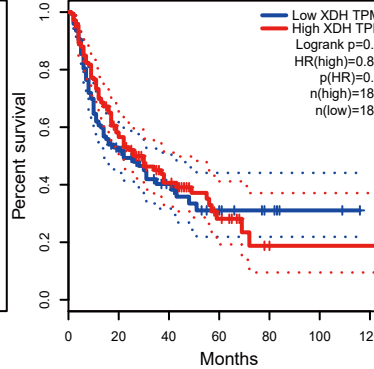

# LUSC

## Overall Survival

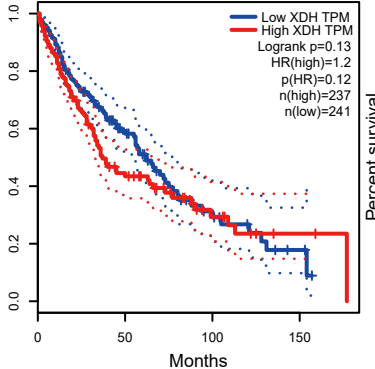

# LUSC

## Disease Free Survival

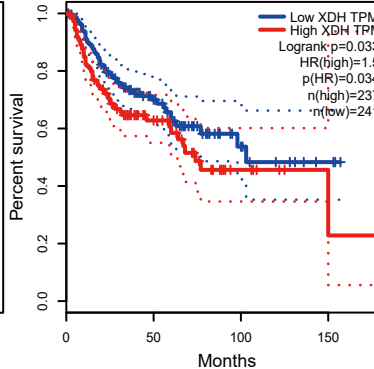

# MESO

## Overall Survival

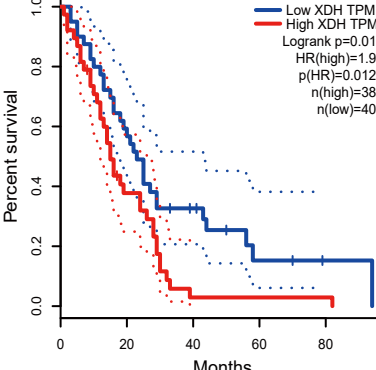

# MESO

## Disease Free Survival

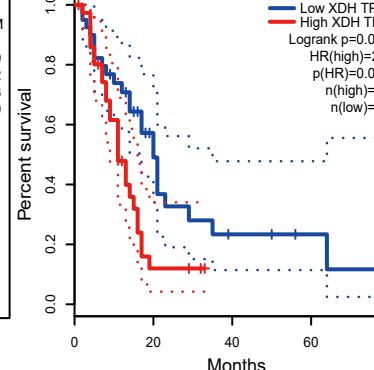

# OV

## Overall Survival

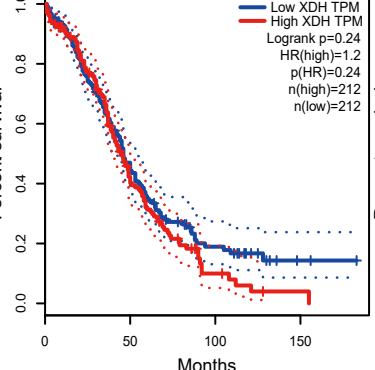

# OV

## Disease Free Survival

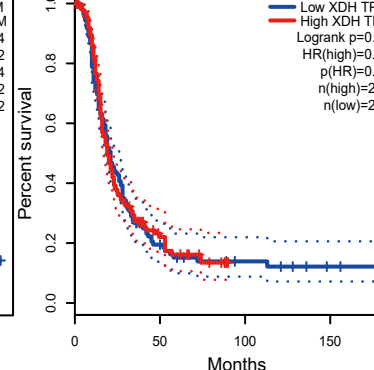

# PAAD

## Overall Survival

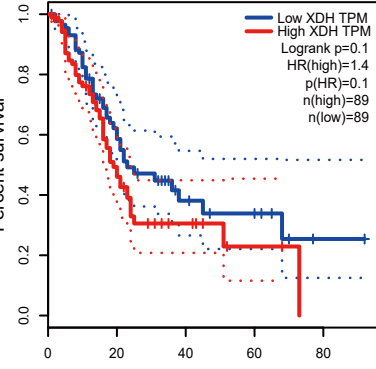

# PAAD

## Disease Free Survival

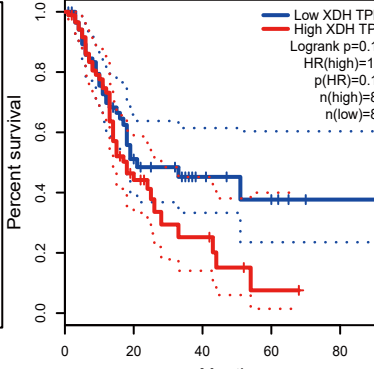

# PRAD

## Overall Survival

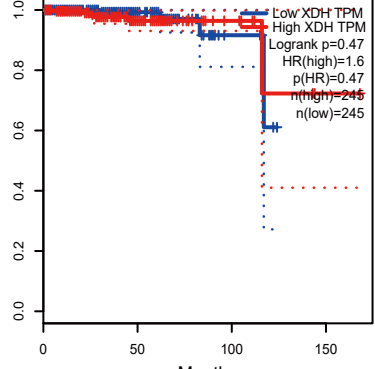

# PRAD

## Disease Free Survival

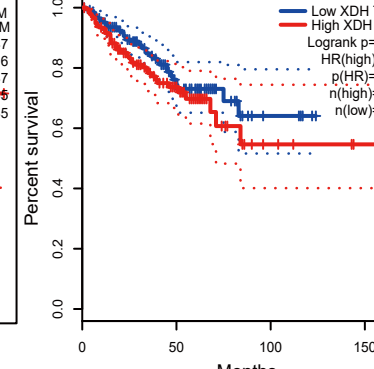

# READ

## Overall Survival

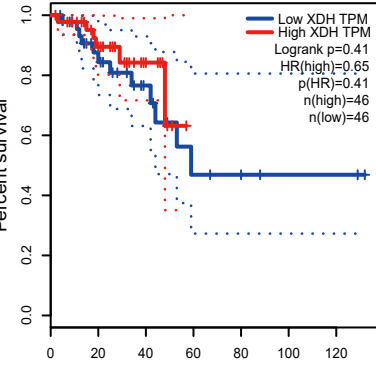

# READ

## Disease Free Survival

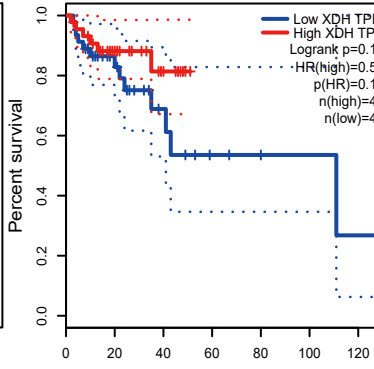

# SARC

## Overall Survival

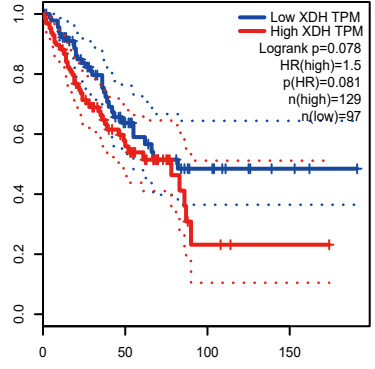

# SARC

## Disease Free Survival

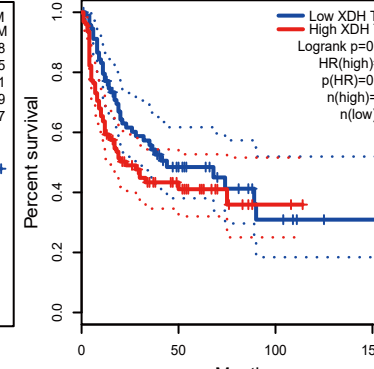

# SKCM

## Overall Survival

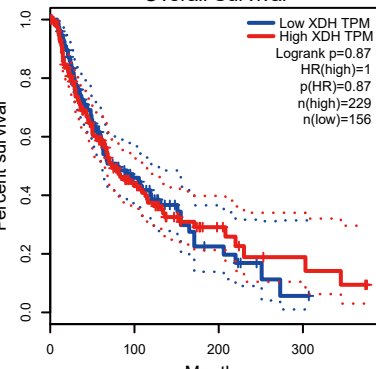

# SKCM

## Disease Free Survival

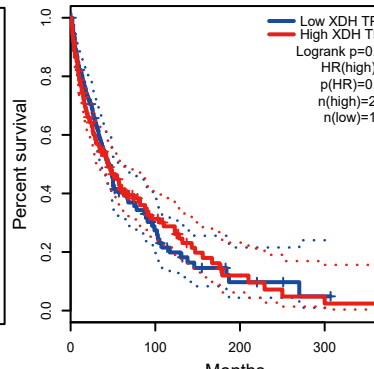

# STAD

## Overall Survival

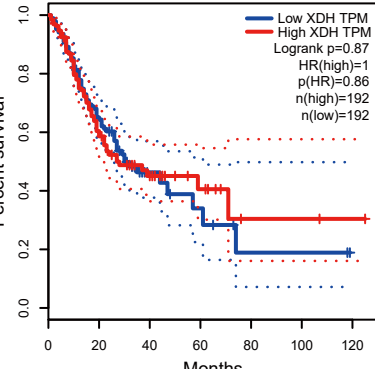

# STAD

## Disease Free Survival

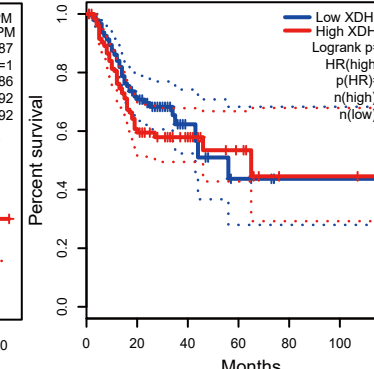

### TGCS

#### Overall Survival

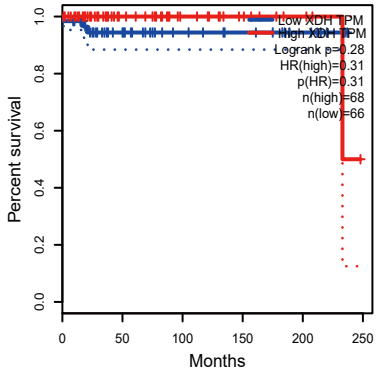

### TGCS

#### Disease Free Survival

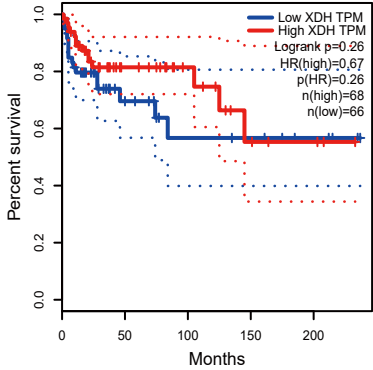

### THCA

#### Overall Survival

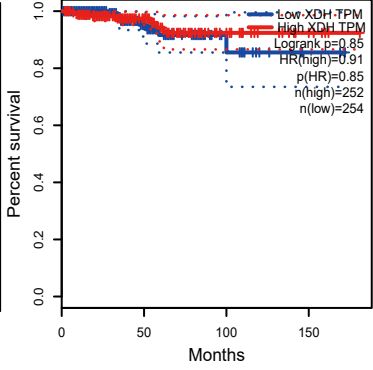

### THCA

#### Disease Free Survival

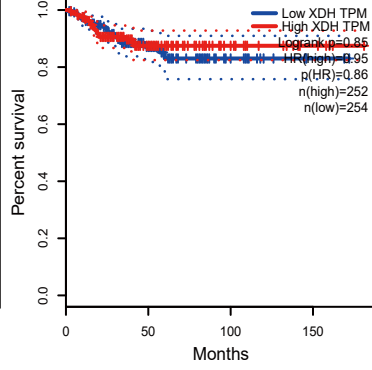

### THYM

#### Overall Survival

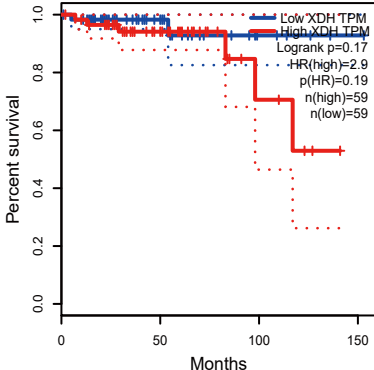

### THYM

#### Disease Free Survival

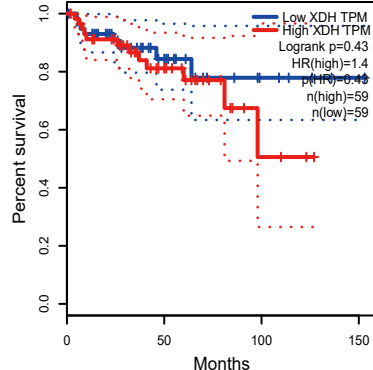

### UCEC

#### Overall Survival

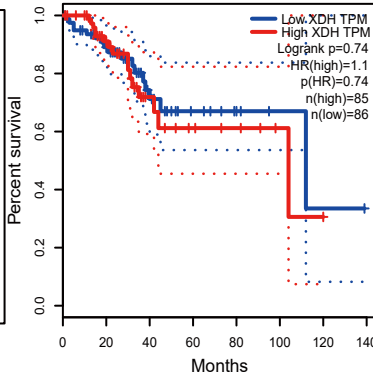

### UCEC

#### Disease Free Survival

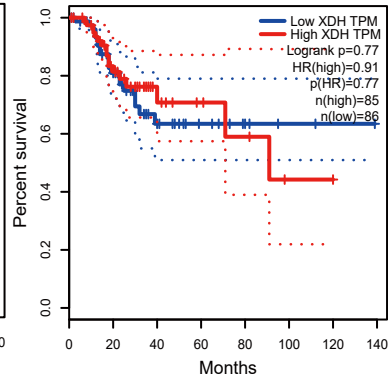

### UCS

#### Overall Survival

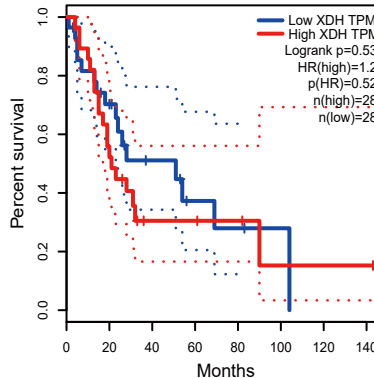

### UCS

#### Disease Free Survival

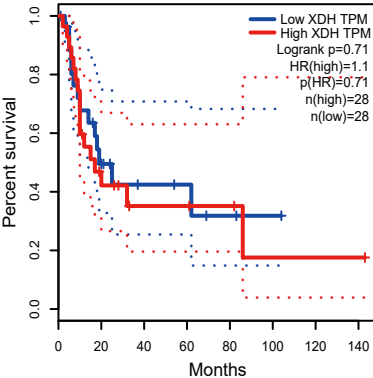

# Supplementary Figure 2

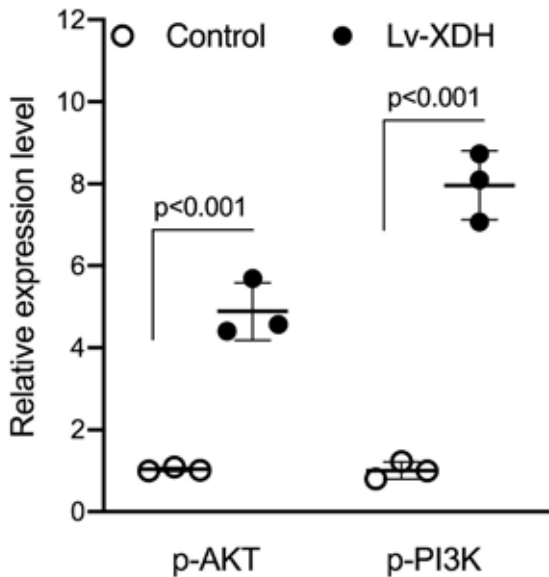

# Supplementary Figure 3

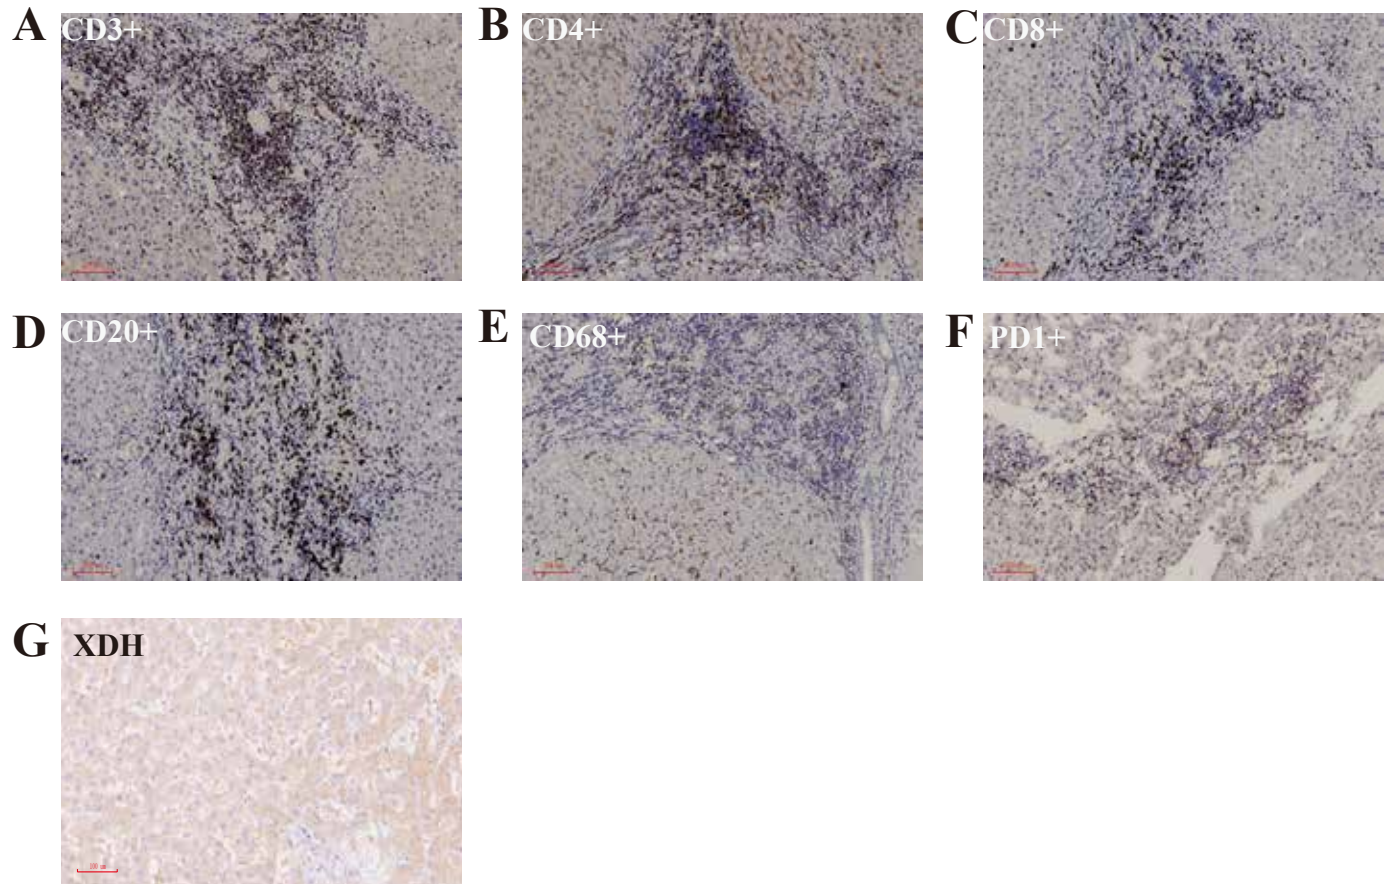



Supplementary Table 1

| Antibody          | Source                          | Catalogue  | Dilution |
|-------------------|---------------------------------|------------|----------|
| $\alpha$ -Tubulin | GeneTex Inc.                    | #GTX102078 | 1:1000   |
| AKT               | Cell Signaling Technology, Inc. | #9272      | 1:1000   |
| p-AKT             | Cell Signaling Technology, Inc. | #4060      | 1:1000   |
| PI3K              | Cell Signaling Technology, Inc. | #4249      | 1:1000   |
| p-PI3K            | Cell Signaling Technology, Inc. | #4228      | 1:1000   |
| XDH               | Santa Cruz Biotechnology        | #sc-398548 | 1:1000   |

## Supplementary Table 2

| Markers | Antibody source               | Species          | Dilution |
|---------|-------------------------------|------------------|----------|
| CD3     | MXB Biotechnologies, MAB0740  | Mouse monoclonal | 1:200    |
| CD4     | MXB Biotechnologies, MAB-0251 | Mouse monoclonal | 1:200    |
| CD8     | MXB Biotechnologies, MAB-0021 | Mouse monoclonal | 1:200    |
| CD20    | MXB Biotechnologies, MAB-0669 | Mouse monoclonal | 1:200    |
| CD68    | MXB Biotechnologies, Kit-0026 | Mouse monoclonal | 1:200    |
| PD-1    | MXB Biotechnologies, MAB-0734 | Mouse monoclonal | 1:50     |

Supplementary Table 3

| Cancer               | Cancer Type                         | P value  | Fold change | Rank (%) | Sample | Reference |
|----------------------|-------------------------------------|----------|-------------|----------|--------|-----------|
| Bladder              | Superficial Bladder Cancer          | 9.05E-4  | -2.181      | 5%       | 54     | 15161696  |
| Breast               | Male Breast Carcinoma               | 1.51E-4  | -2.082      | 6%       | 593    | TCGA      |
| Colorectal           | Rectosigmoid Adenocarcinoma         | 1.96E-8  | -10.885     | 3%       | 237    | TCGA      |
|                      | Rectal Adenocarcinoma               | 1.60E-14 | -4.390      | 8%       | 237    | TCGA      |
|                      | Colorectal Carcinoma                | 1.22E-12 | -3.043      | 3%       | 82     | 20143136  |
|                      | Colorectal Carcinoma                | 9.87E-10 | -2.613      | 4%       | 105    | 20957034  |
|                      | Colorectal Adenocarcinoma           | 1.07E-7  | -2.158      | 5%       | 105    | 20957034  |
|                      | Colon Adenoma                       | 1.11E-6  | -2.184      | 6%       | 64     | 18171984  |
| Head and Neck Cancer | Oral Cavity Squamous Cell Carcinoma | 6.20E-7  | 2.163       | 9%       | 79     | 21853135  |
| Leukemia             | T-Cell Acute Lymphoblastic Leukemia | 1.14E-5  | -2.597      | 10%      | 127    | 10663620  |
| Liver                | Hepatocellular Carcinoma            | 2.87E-9  | -5.058      | 1%       | 75     | 17393520  |
|                      | Hepatocellular Carcinoma            | 4.56E-9  | -3.046      | 2%       | 43     | 21159642  |
|                      | Hepatocellular Carcinoma            | 5.40E-50 | -2.989      | 3%       | 445    | 21159642  |
|                      | Hepatocellular Carcinoma            | 5.20E-12 | -2.551      | 6%       | 197    | 12058060  |
| Lung                 | Lung Adenocarcinoma                 | 7.12E-17 | 2.229       | 1%       | 246    | 22327624  |
| Lymphoma             | Anaplastic Large Cell Lymphoma      | 2.10E-5  | -2.379      | 9%       | 60     | 18492688  |

Supplementary Table 4

| Cancer                  | Purity |              | B cell |              | CD8+ T cell |              | CD4+ T cell |              | Macrophage |              | Neutrophil |              | dendritic cell |              |
|-------------------------|--------|--------------|--------|--------------|-------------|--------------|-------------|--------------|------------|--------------|------------|--------------|----------------|--------------|
|                         | rho    | p            | rho    | p            | rho         | p            | rho         | p            | rho        | p            | rho        | p            | rho            | p            |
| ACC (n=79)              | -0.011 | 0.926        | -0.053 | 0.657        | -0.065      | 0.584        | 0.009       | 0.939        | 0.134      | 0.257        | 0.188      | 0.111        | -0.246         | <b>0.036</b> |
| BLCA (n=408)            | -0.100 | 0.055        | 0.046  | 0.381        | 0.200       | <b>0.000</b> | -0.005      | 0.928        | -0.233     | <b>0.000</b> | 0.337      | <b>0.000</b> | 0.292          | <b>0.000</b> |
| BRCA (n=1100)           | -0.194 | <b>0.000</b> | -0.159 | <b>0.000</b> | 0.081       | <b>0.010</b> | 0.017       | 0.602        | 0.032      | 0.315        | 0.204      | <b>0.000</b> | 0.094          | <b>0.003</b> |
| BRCA-Basal (n=191)      | -0.120 | 0.114        | -0.197 | <b>0.009</b> | 0.137       | 0.071        | -0.168      | <b>0.027</b> | 0.160      | <b>0.035</b> | 0.117      | 0.124        | -0.093         | 0.224        |
| BRCA-Her2 (n=82)        | -0.020 | 0.863        | -0.042 | 0.728        | -0.049      | 0.680        | 0.035       | 0.771        | 0.062      | 0.604        | 0.266      | <b>0.024</b> | 0.273          | <b>0.020</b> |
| BRCA-LumA (n=568)       | -0.173 | <b>0.000</b> | -0.130 | <b>0.003</b> | 0.093       | <b>0.034</b> | 0.012       | 0.782        | 0.039      | 0.371        | 0.157      | <b>0.000</b> | 0.069          | 0.117        |
| BRCA-LumB (n=219)       | -0.069 | 0.344        | -0.119 | 0.101        | 0.184       | <b>0.011</b> | 0.027       | 0.706        | 0.094      | 0.195        | 0.109      | 0.134        | 0.020          | 0.783        |
| CESC (n=306)            | -0.208 | <b>0.000</b> | 0.043  | 0.478        | 0.184       | <b>0.002</b> | 0.008       | 0.898        | -0.018     | 0.766        | 0.258      | <b>0.000</b> | 0.279          | <b>0.000</b> |
| CHOL (n=36)             | 0.018  | 0.917        | -0.039 | 0.822        | 0.126       | 0.471        | -0.052      | 0.765        | 0.268      | 0.119        | 0.240      | 0.165        | -0.079         | 0.652        |
| COAD (n=458)            | -0.153 | <b>0.002</b> | 0.085  | 0.161        | 0.186       | <b>0.002</b> | 0.003       | 0.961        | -0.098     | 0.107        | 0.165      | <b>0.006</b> | 0.118          | 0.051        |
| DLBC (n=48)             | -0.201 | 0.202        | -0.112 | 0.487        | 0.201       | 0.208        | -0.088      | 0.583        | 0.074      | 0.646        | 0.103      | 0.522        | -0.042         | 0.793        |
| ESCA (n=185)            | -0.138 | 0.065        | -0.074 | 0.321        | 0.028       | 0.710        | -0.019      | 0.797        | -0.239     | <b>0.001</b> | 0.144      | 0.054        | 0.047          | 0.531        |
| GBM (n=153)             | -0.086 | 0.317        | -0.011 | 0.895        | 0.125       | 0.146        | 0.030       | 0.731        | 0.096      | 0.267        | 0.158      | 0.065        | 0.294          | <b>0.000</b> |
| HNSC (n=522)            | -0.247 | <b>0.000</b> | 0.103  | <b>0.022</b> | 0.285       | <b>0.000</b> | -0.023      | 0.606        | -0.008     | 0.861        | 0.168      | <b>0.000</b> | 0.295          | <b>0.000</b> |
| HNSC-HPV- (n=422)       | -0.248 | <b>0.000</b> | 0.088  | 0.077        | 0.267       | <b>0.000</b> | 0.019       | 0.711        | -0.027     | 0.594        | 0.206      | <b>0.000</b> | 0.282          | <b>0.000</b> |
| HNSC-HPV+ (n=98)        | -0.129 | 0.227        | 0.149  | 0.163        | 0.254       | <b>0.016</b> | -0.089      | 0.408        | 0.016      | 0.879        | 0.077      | 0.473        | 0.312          | <b>0.003</b> |
| KICH (n=66)             | -0.245 | <b>0.048</b> | 0.075  | 0.551        | 0.011       | 0.929        | 0.248       | <b>0.046</b> | 0.085      | 0.502        | 0.184      | 0.141        | 0.299          | <b>0.015</b> |
| KIRC (n=533)            | -0.168 | <b>0.000</b> | 0.016  | 0.733        | -0.004      | 0.924        | -0.028      | 0.548        | 0.005      | 0.919        | 0.067      | 0.152        | 0.156          | <b>0.001</b> |
| KIRP (n=290)            | -0.166 | <b>0.007</b> | 0.060  | 0.333        | 0.218       | <b>0.000</b> | 0.121       | 0.052        | -0.006     | 0.921        | 0.298      | <b>0.000</b> | 0.234          | <b>0.000</b> |
| LGG (n=516)             | 0.010  | 0.829        | -0.053 | 0.250        | -0.084      | <b>0.066</b> | 0.141       | <b>0.002</b> | 0.046      | 0.320        | 0.145      | <b>0.001</b> | 0.151          | <b>0.001</b> |
| LIHC (n=371)            | 0.119  | <b>0.026</b> | -0.178 | <b>0.001</b> | 0.157       | <b>0.003</b> | -0.104      | 0.053        | 0.009      | 0.871        | -0.088     | 0.101        | -0.179         | <b>0.001</b> |
| LUAD (n=515)            | -0.162 | <b>0.000</b> | -0.069 | 0.126        | 0.018       | 0.693        | 0.061       | 0.174        | 0.051      | 0.254        | 0.230      | <b>0.000</b> | 0.332          | <b>0.000</b> |
| LUSC (n=501)            | -0.263 | <b>0.000</b> | -0.236 | <b>0.000</b> | 0.025       | 0.579        | -0.008      | 0.856        | -0.062     | 0.177        | 0.152      | <b>0.001</b> | 0.153          | <b>0.001</b> |
| MESO (n=87)             | -0.117 | 0.283        | 0.401  | <b>0.000</b> | 0.076       | 0.491        | 0.109       | 0.320        | -0.001     | 0.994        | 0.016      | 0.882        | 0.290          | <b>0.007</b> |
| OV (n=303)              | -0.180 | <b>0.004</b> | 0.086  | 0.176        | 0.164       | <b>0.010</b> | -0.091      | 0.154        | 0.209      | <b>0.001</b> | 0.270      | <b>0.000</b> | 0.118          | 0.063        |
| PAAD (n=179)            | -0.116 | 0.129        | 0.255  | <b>0.001</b> | -0.031      | 0.690        | 0.018       | 0.815        | -0.046     | 0.551        | 0.054      | 0.483        | 0.073          | 0.342        |
| PCPG (n=181)            | -0.016 | 0.834        | 0.077  | 0.325        | 0.150       | 0.053        | -0.164      | <b>0.034</b> | 0.150      | 0.054        | 0.202      | <b>0.009</b> | 0.139          | 0.073        |
| PRAD (n=498)            | -0.106 | <b>0.030</b> | 0.112  | <b>0.023</b> | 0.221       | <b>0.000</b> | 0.000       | 0.997        | 0.127      | <b>0.009</b> | 0.244      | <b>0.000</b> | 0.110          | <b>0.025</b> |
| READ (n=166)            | -0.113 | 0.184        | 0.188  | 0.076        | 0.171       | 0.106        | -0.073      | 0.493        | -0.049     | 0.647        | 0.081      | 0.445        | 0.099          | 0.354        |
| SARC (n=260)            | -0.202 | <b>0.002</b> | 0.029  | 0.652        | 0.299       | <b>0.000</b> | -0.298      | <b>0.000</b> | -0.084     | 0.193        | -0.047     | 0.468        | 0.206          | <b>0.001</b> |
| SKCM (n=471)            | -0.053 | 0.258        | -0.076 | 0.104        | -0.024      | 0.607        | -0.228      | <b>0.000</b> | 0.030      | 0.522        | 0.011      | 0.810        | -0.059         | 0.206        |
| SKCM-Metastasis (n=368) | -0.005 | 0.929        | -0.030 | 0.574        | 0.039       | 0.460        | -0.204      | <b>0.000</b> | 0.087      | 0.101        | 0.063      | 0.235        | 0.026          | 0.631        |
| SKCM-Primary (n=103)    | -0.243 | <b>0.013</b> | -0.156 | 0.118        | -0.127      | 0.204        | -0.057      | 0.568        | 0.015      | 0.882        | 0.261      | <b>0.008</b> | -0.157         | 0.115        |
| STAD (n=415)            | -0.107 | <b>0.037</b> | 0.013  | 0.795        | -0.151      | <b>0.003</b> | -0.012      | 0.809        | -0.156     | <b>0.002</b> | 0.055      | 0.286        | -0.071         | 0.166        |
| TGCT (n=150)            | 0.170  | <b>0.039</b> | 0.005  | 0.949        | -0.093      | 0.262        | 0.177       | <b>0.032</b> | 0.032      | 0.700        | 0.045      | 0.587        | -0.109         | 0.190        |
| THCA (n=509)            | -0.056 | 0.217        | -0.175 | <b>0.000</b> | 0.009       | 0.849        | 0.055       | 0.229        | -0.189     | <b>0.000</b> | 0.520      | <b>0.000</b> | 0.627          | <b>0.000</b> |
| THYM (n=120)            | 0.127  | 0.174        | -0.229 | <b>0.014</b> | -0.384      | 0.000        | -0.407      | <b>0.000</b> | 0.146      | 0.119        | -0.278     | <b>0.003</b> | -0.371         | <b>0.000</b> |
| UCEC (n=545)            | -0.063 | 0.283        | -0.273 | <b>0.010</b> | -0.071      | 0.512        | -0.005      | 0.966        | -0.379     | <b>0.000</b> | 0.069      | 0.525        | 0.309          | <b>0.003</b> |
| UCS (n=57)              | -0.203 | 0.140        | 0.214  | 0.124        | -0.195      | 0.162        | 0.247       | 0.074        | 0.349      | <b>0.011</b> | 0.395      | <b>0.003</b> | 0.167          | 0.232        |
| UVM (n=80)              | 0.022  | 0.848        | -0.123 | 0.287        | 0.137       | 0.234        | -0.146      | 0.204        | 0.107      | 0.355        | 0.224      | 0.051        | -0.206         | 0.072        |

Supplementary Table 5

| Symbol  | Name                                                      | Function                                                |
|---------|-----------------------------------------------------------|---------------------------------------------------------|
| ANGPTL1 | angiopoietin-like 1                                       | Cytokine Receptors                                      |
| CAT     | catalase                                                  | Cytokines                                               |
| CD320   | CD320 molecule                                            | Cytokines                                               |
| HDAC1   | histone deacetylase 1                                     | Adaptive immunity                                       |
| HDGF    | hepatoma-derived growth factor                            | Cytokines                                               |
| HRG     | histidine-rich glycoprotein                               | Adaptive immunity                                       |
| HSPA4   | heat shock 70kDa protein 4                                | Antigen Processing and Presentation                     |
| KNG1    | kininogen 1                                               | Adaptive immunity                                       |
| MAPK3   | mitogen-activated protein kinase 3                        | Natural Killer Cell Cytotoxicity                        |
| MMP12   | matrix metalloproteinase 12                               | Adaptive immunity                                       |
| NDRG1   | N-myc downstream regulated 1                              | Adaptive immunity                                       |
| PGF     | placental growth factor                                   | Cytokines                                               |
| PIK3R1  | phosphoinositide-3-kinase, regulatory subunit 1           | TCR signaling Pathway; Natural Killer Cell Cytotoxicity |
| PTK2    | PTK2 protein tyrosine kinase 2                            | Adaptive immunity                                       |
| RBP4    | retinol binding protein 4, plasma                         | Adaptive immunity                                       |
| RFXANK  | regulatory factor X-associated ankyrin-containing protein | Antigen Processing and Presentation                     |
| SPP1    | secreted phosphoprotein 1                                 | Cytokines                                               |
| TMPRSS6 | transmembrane protease, serine 6                          | Adaptive immunity                                       |
| TMSB10  | thymosin beta 10                                          | Adaptive immunity                                       |
| TPT1    | tumor protein, translationally-controlled 1               | Adaptive immunity                                       |
