# Supplementary material for: Xanthine dehydrogenase as a prognostic biomarker related to tumor immunology in hepatocellular carcinoma
Source: Cancer Cell Int. 2021 Sep 8;21:475. doi: 10.1186/s12935-021-02173-7 (PMC8425161; doi:10.1186/s12935-021-02173-7)
Supplement: Supplementary file 2 — Additional file 2: Immunostaining score. [file 12935_2021_2173_MOESM2_ESM.xlsx]

## Sheet: Sheet1
patients	XDH	CD3	CD4	CD8	CD20	CD68	PD1
164473	0.27	100	50	364	0	138	16
181025	0	706	304	200	537	336	15
181100	0.45	187	216	309	142	333	9
181154	0.135	769	613	420	196	435	10
2000870	0.4	853	876	321	426	12	28
2000963	0	290	276	165	174	0	NA
2001858	0.05	325	360	156	55	190	15
2002297	0	366	406	332	100	149	33
2002298	4.28	760	553	664	606	235	4
2003311	1.2	511	368	428	314	465	12
2003581	0	231	287	124	135	135	24
2003878	0	870	366	121	160	153	28
2004036	0.025	406	420	360	127	274	60
2004547	0.075	397	330	484	75	130	4
181025-1	2.85	419	330	270	190	287	0
1	2.375	88	112	456	18	300	20
2	0.7	370	667	245	79	152	7
3	2.85	213	291	375	109	150	8
4	0.025	192	858	234	10	78	6
5	2.55	145	202	414	120	210	15
6	1.05	284	210	NA	123	32	12
