# Supplementary material for: Xanthine dehydrogenase as a prognostic biomarker related to tumor immunology in hepatocellular carcinoma
Source: Cancer Cell Int. 2021 Sep 8;21:475. doi: 10.1186/s12935-021-02173-7 (PMC8425161; doi:10.1186/s12935-021-02173-7)
Supplement: Supplementary file 3 — Additional file 3: WB quantification. [file 12935_2021_2173_MOESM3_ESM.xlsx]

## Sheet: Sheet1
time1	control	LV-XDH	LV-XDH/control
XDH	2052.3	51139.2	24.9179
Akt	51843.2	53439.5	1.03079
p-Akt	28163.7	117362	4.16714
PI3K	52532.8	27464.2	0.522801
p-PI3K	15774.7	47620.1	3.01876
atubin	54630	53200.1	0.973827
time2	control	LV-XDH	LV-XDH/control
XDH	3743.32	48555.2	12.9712
Akt	62211.8	45764.2	0.735619
p-Akt	31552.2	104343	3.307
PI3K	61435.2	21235.2	0.345652
p-PI3K	12123.1	45463.1	3.75012
atubin	61222.5	52341.1	0.854932
time3	control	LV-XDH	LV-XDH/control
XDH	3030.24	54563.1	18.0062
Akt	51202.1	50532.5	0.986923
p-Akt	25542.1	143532	5.61943
PI3K	50321.7	22342.2	0.443987
p-PI3K	12341.2	44352.4	3.59384
atubin	50546.9	50543.6	0.999935
atubin	p-PI3K	PI3K	p-Akt	Akt	XDH
0.973827	3.01876	0.522801	4.16714	1.03079	24.9179
0.854932	3.75012	0.345652	3.307	0.735619	12.9712
0.999935	3.59384	0.443987	5.61943	0.986923	18.0062
